# Supplementary material
Source: HighWire-hosted journal article supplement (https://bmjopenquality.bmj.com/highwire/filestream/136231/field_highwire_adjunct_files/0/ds4113.docx)
Supplement: ds4113.docx [file ds4113.docx]

**Figure 1: Number incidents reported by junior doctors throughout 12 months**

**Figure 2: The number of doctors who had been *shown how* to complete an incident form**

**Figure 3: Number of doctors who were aware that feedback regarding an incident was given**

**Figure 4: Confidence in finding an incident form pre- and post- intervention**

Figure 5: Confidence in completing an incident form pre- and post- intervention

Figure 6: Confidence in knowing what to report as an incident form pre- and post- intervention
